# Supplementary material for: A novel “on–off–on” fluorescence assay for the discriminative detection of Cu(ii) and l-cysteine based on red-emissive Si-CDs and cellular imaging applications
Source: Royal Society of Chemistry journal article supplement (doi:10.1039/c9tb02681a), 2019-12-15
Supplement: c9tb02681a1.pdf [file c9tb02681a1.pdf]

## *Supporting Information*

### **A novel fluorescent “on-off-on” assay for discriminative detection of Cu(II) and L-cysteine based on red-emissive Si-CDs and cellular imaging application**

*Minghui Zan<sup>a,d,#</sup>, Cong Li<sup>a,#</sup>, Daoming Zhu<sup>a</sup>, Lang Rao<sup>a</sup>, Qian-Fang Meng<sup>a</sup>, Bei Chen<sup>a</sup>, Wei Xie<sup>a</sup>, Xingwang Qie<sup>b</sup>, Li Li<sup>b</sup>, Xiaojiao Zeng<sup>c</sup>, Yirong Li<sup>\*c</sup>, Wen-fei Dong<sup>\*b</sup>, Wei Liu<sup>\*a,d</sup>*

<sup>a</sup> Key Laboratory of Artificial Micro- and Nano-Structures of Ministry of Education, School of Physics and Technology, Wuhan University, Wuhan, Hubei 430072, China.

<sup>b</sup> CAS Key Laboratory of Bio-Medical Diagnostics, Suzhou Institute of Biomedical Engineering and Technology, Chinese Academy of Sciences, Suzhou, Jiangsu 215163, China.

<sup>c</sup> Department of Clinical Laboratory, Zhongnan Hospital, Wuhan University, Wuhan, Hubei 430071, China.

<sup>d</sup> Shenzhen Research Institute of Wuhan University, Shenzhen, Guangdong 518057, China.

# These authors contributed equally to this work.

\* Corresponding authors.

E-mail: [wliu@whu.edu.cn](mailto:wliu@whu.edu.cn) (W. Liu).

E-mail: [wenfeidong@126.com](mailto:wenfeidong@126.com) (W. Dong).

E-mail: [liyirong838@163.com](mailto:liyirong838@163.com) (Y. Li).

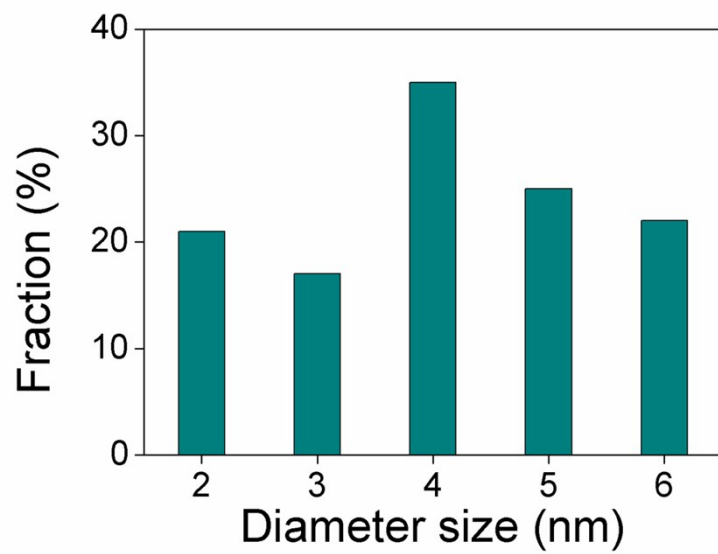

Figure S1: Size distribution of the Si-CDs.

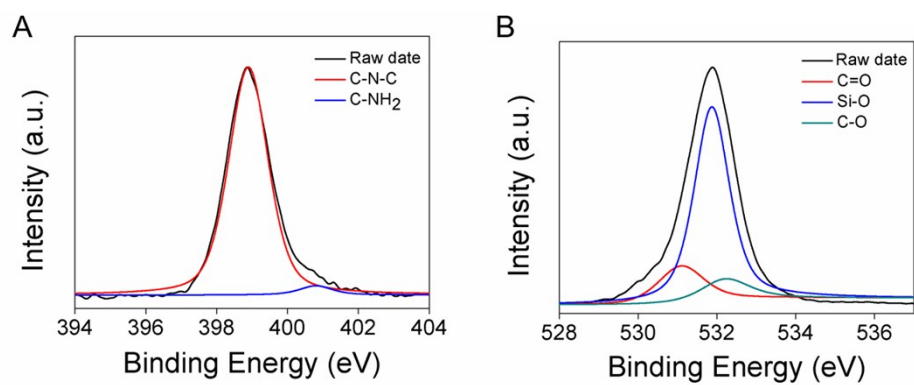

Figure S2: (A) N 1s XPS of Si-CDs. (B) O 1s XPS of Si-CDs.

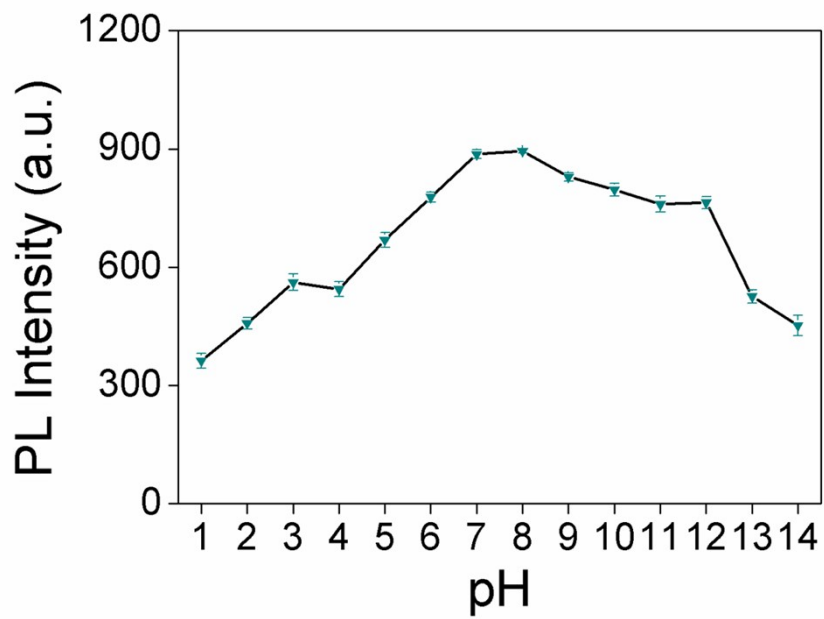

Figure S3: Effect of pH value on the PL intensity of Si-CDs system.

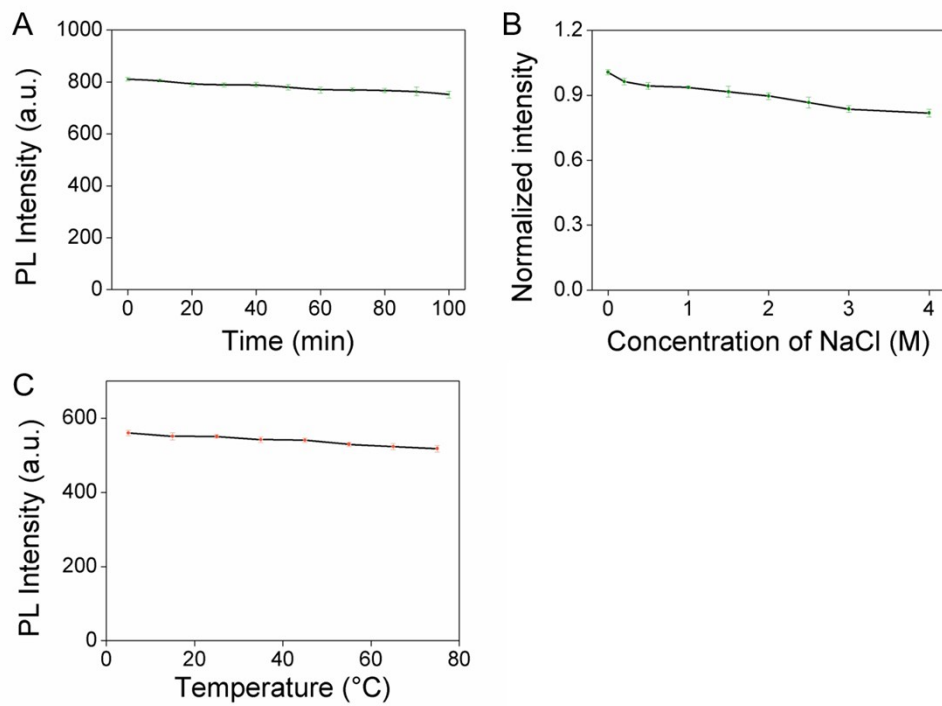

Figure S4: Effects of (A) UV irradiation, (B) ionic strength and (C) different temperature on the PL intensity of Si-CDs.

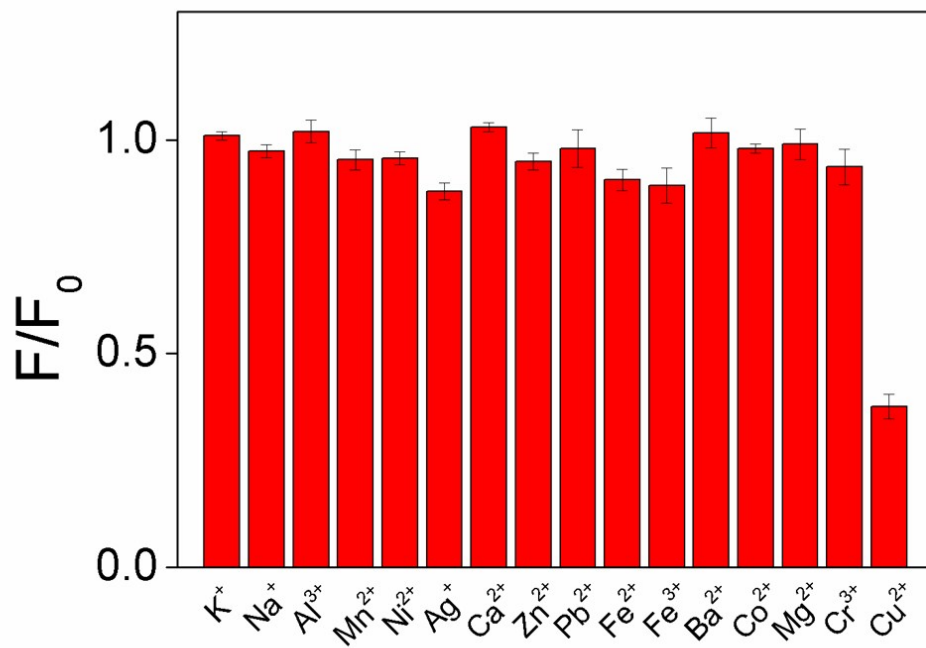

Figure S5: Various metal ions effects on  $\text{Cu}^{2+}$  determination.

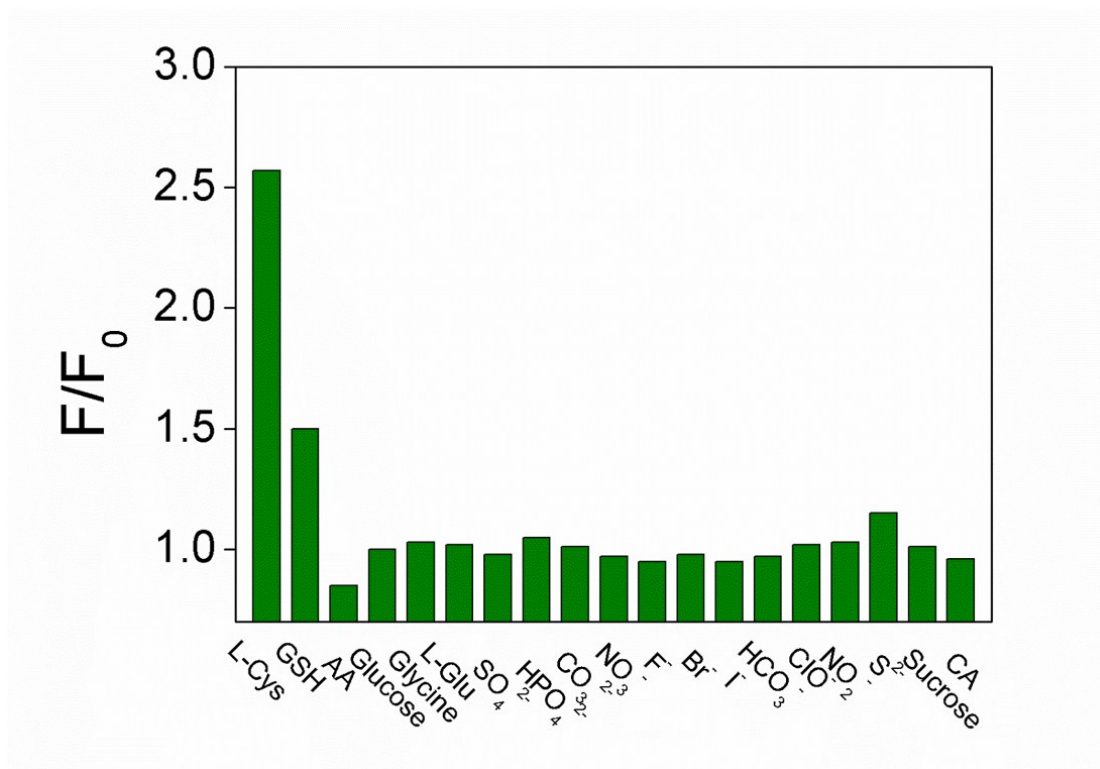

Figure S6: Fluorescence response of the Si-CDs@Cu<sup>2+</sup> system in the presence of different analytes.

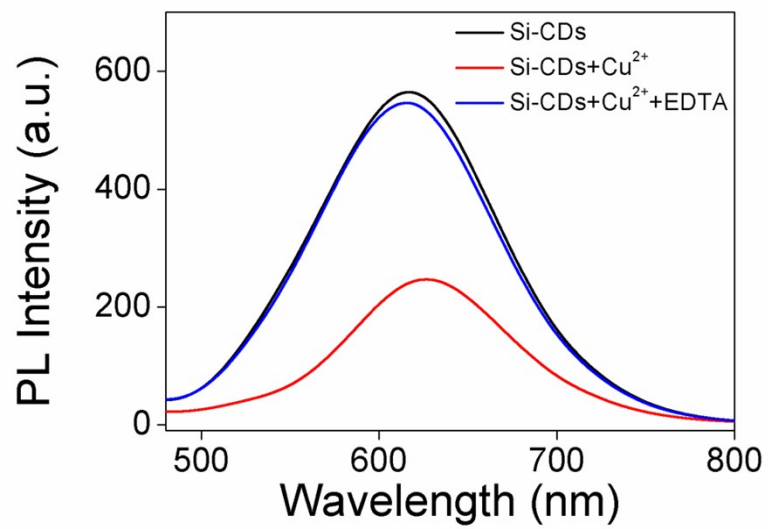

Figure S7: Fluorescence spectra of Si-CDs, Si-CDs+Cu<sup>2+</sup>, and Si-CDs+Cu<sup>2+</sup>+EDTA.



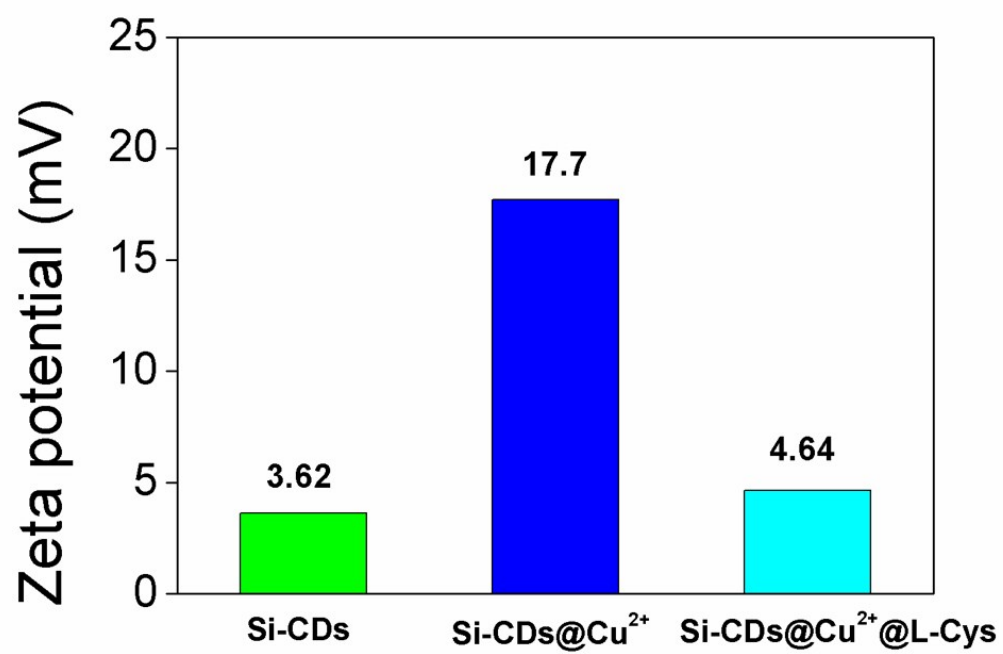

Figure S8: Zeta potential values of the Si-CDs, Si-CDs@Cu<sup>2+</sup> and Si-CDs@Cu<sup>2+</sup>@L-Cys.

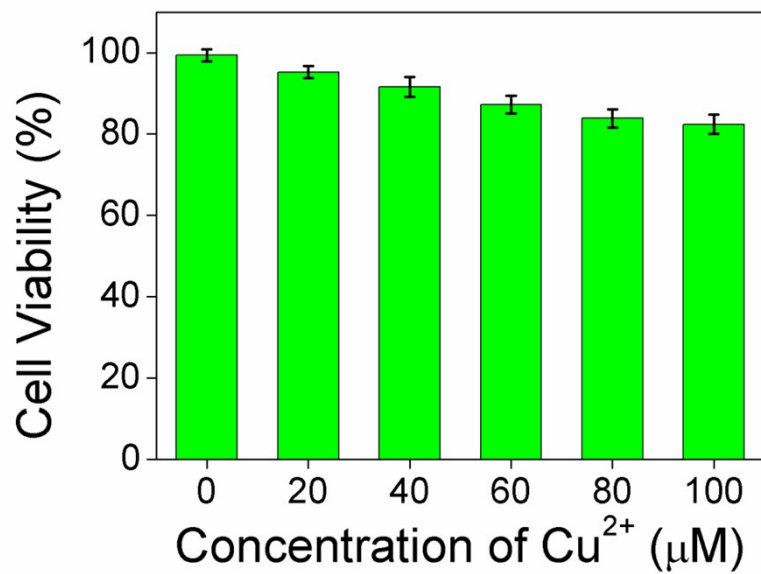

Figure S9: Cytotoxicity test of Si-CDs@Cu<sup>2+</sup> on HeLa cells viability.

Table S1. Different methods for Cu<sup>2+</sup> detection.

| Methods          | Linear range<br>( $\mu\text{M}$ ) | Detection limit<br>( $\mu\text{M}$ ) | Detection<br>Wavelength | Reference      |
|------------------|-----------------------------------|--------------------------------------|-------------------------|----------------|
| Colorimetry      | 0.1-10.0                          | 0.632                                | —                       | 1 <sup>1</sup> |
| Electrochemistry | 0.08–2.2                          | 0.0355                               | —                       | 2 <sup>2</sup> |
| B,N-carbon dots  | 1-25.0                            | 0.3                                  | green                   | 3 <sup>3</sup> |
| NCDs             | 10-400                            | 10                                   | blue                    | 4 <sup>4</sup> |
| CNDs             | 0.6-35.0                          | 0.17                                 | blue                    | 5 <sup>5</sup> |
| FIIS             | 0-70.0                            | 0.11                                 | 529 nm                  | 6 <sup>6</sup> |
| Si-CDs           | 10 ~ 90                           | 0.53                                 | red                     | This work      |

Table S2: Fitted parameters of the FL decay curves of the Si-CDs, Si-CDs@Cu<sup>2+</sup>, Si-CDs@Cu<sup>2+</sup>@L-Cys in aqueous solution. Note: The lifetime was monitored by the emission wavelength at 615 nm.

| Sample                         | $\tau_1$ (ns) | A <sub>1</sub> (%) | $\tau_2$ (ns) | A <sub>2</sub> (%) | $\phi$ | $\tau_{\text{avg}}$ (ns) |
|--------------------------------|---------------|--------------------|---------------|--------------------|--------|--------------------------|
| Si-CDs                         | 2.5           | 75.29              | 7.9           | 24.71              | 1.273  | <b>5.25</b>              |
| Si-CDs@Cu <sup>2+</sup>        | 2.09          | 74.11              | 5.89          | 25.89              | 1.203  | <b>3.97</b>              |
| Si-CDs@Cu <sup>2+</sup> @L-Cys | 2.64          | 74.31              | 7.71          | 25.69              | 1.16   | <b>5.19</b>              |

Table S3. Determination of the level of Cu<sup>2+</sup> ions in tap water samples and L-Cys in human plasma samples.

| Sample      | Analyte          | Add<br>( $\mu\text{M}$ ) | Found<br>( $\mu\text{M}$ ) | Recovery<br>(%) | RSD<br>(n=3, %) |
|-------------|------------------|--------------------------|----------------------------|-----------------|-----------------|
| Tap water 1 | Cu <sup>2+</sup> | 5                        | 5.03                       | 100.6           | 2.3             |
| Tap water 2 | Cu <sup>2+</sup> | 10                       | 10.28                      | 102.8           | 1.0             |
| Plasma 1    | L-Cys            | 10                       | 10.43                      | 104.3           | 1.5             |
| Plasma 2    | L-Cys            | 20                       | 19.84                      | 99.2            | 3.6             |

## References :

1. L.-J. Miao, J.-W. Xin, Z.-Y. Shen, Y.-J. Zhang, H.-Y. Wang and A.-G. Wu, *Sensors and Actuators B: Chemical*, 2013, **176**, 906-912.
2. J. Zhang, C. Cheng, Y. Huang, L. Qian, B. Zheng, H. Yuan, Y. Guo and D. Xiao, *Analyst*, 2013, **138**, 2073-2079.
3. M.-C. Rong, K.-X. Zhang, Y.-R. Wang and X. Chen, *Chinese Chemical Letters*, 2017, **28**, 1119-1124.
4. M. Ganiga and J. Cyriac, *ChemPhysChem*, 2016, **17**, 2315-2321.
5. W. Lu, Y. Gao, Y. Jiao, S. Shuang, C. Li and C. Dong, *Nanoscale*, 2017, **9**, 11545-11552.
6. Z. Xu, P. Deng, J. Li and S. Tang, *Sensors and Actuators B: Chemical*, 2018, **255**, 2095-2104.
